# Supplementary material
Source: Springer Nature journal article supplement (https://www.springermedizin.de/resource/supplementary/12967_2012_1558_MOESM1_ESM.pdf/9574322)

## ROC analysis

—●— PSP > threshold

—●— CRP < threshold

—◆— PSP / CRP > threshold

① PSP > 9.34 ng/ml

② CRP < 0.36 mg/l

③ PSP/CRP > 0.03

**A**

all subjects

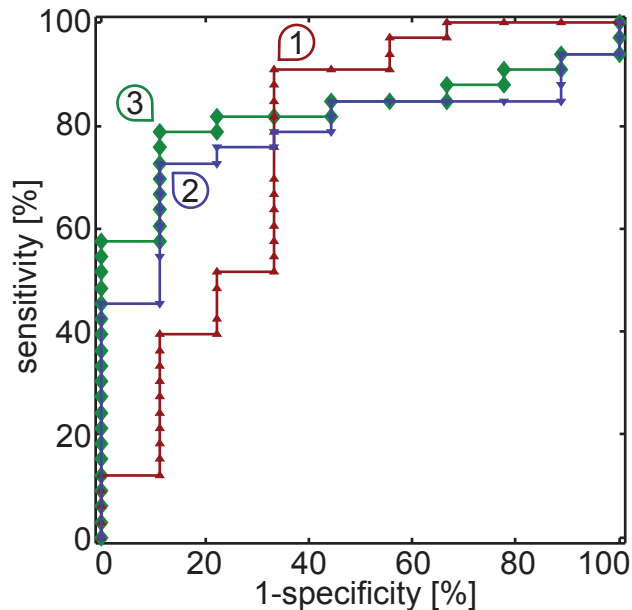

**B**

excluding subjects with extreme hsCRP

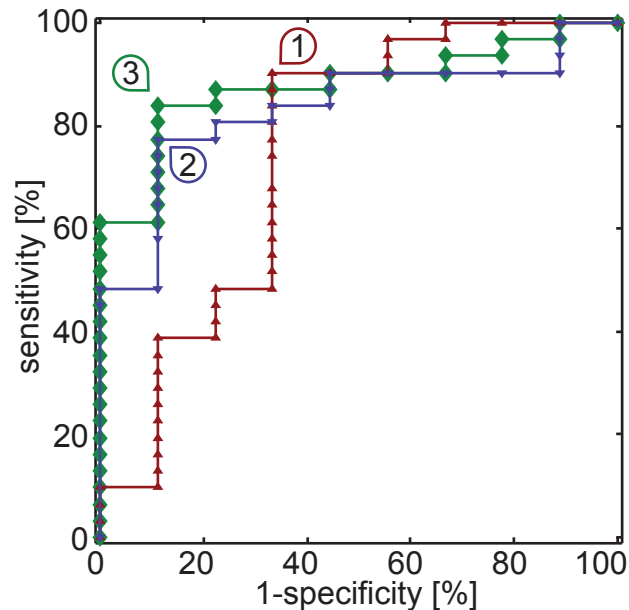

Supplement: MOESM1 [file 9574322]
